# Supplementary material for: The Curious Case of Impersonators and Singers: Telling Voices Apart and Telling Voices Together under Naturally Challenging Listening Conditions
Source: MDPI journal article supplement (doi:10.3390/brainsci13020358), 2023-02-19
Supplement: s1 [file s1]

Experiment 1\_impersonator performance

| Participant | Same/Different Task - accuracy |                     |              | Real or Not Task - accuracy |              |       |
|-------------|--------------------------------|---------------------|--------------|-----------------------------|--------------|-------|
|             | target-target                  | target-impersonator | target-other | Target                      | Impersonator | Other |
| p1          | 0.75                           | 0.83                | 0.75         | 1                           | 0.33         | 0.67  |
| p2          | 0.67                           | 0.75                | 0.92         | 0.83                        | 0.67         | 0.92  |
| p3          | 0.83                           | 0.75                | 0.83         | 1                           | 0.5          | 0.83  |
| p4          | 1                              | 0.75                | 0.92         | 1                           | 0.42         | 1     |
| p5          | 0.83                           | 0.75                | 0.92         | 0.83                        | 0.67         | 1     |
| p6          | 0.67                           | 0.67                | 0.83         | 0.83                        | 0.67         | 0.75  |
| p7          | 0.92                           | 0.83                | 1            | 0.92                        | 0.75         | 1     |
| p8          | 0.92                           | 0.67                | 0.75         | 0.67                        | 0.67         | 0.92  |
| p9          | 0.92                           | 0.75                | 0.92         | 0.92                        | 0.67         | 1     |
| p10         | 0.75                           | 0.5                 | 0.92         | 1                           | 0.42         | 0.83  |
| p11         | 0.67                           | 0.58                | 0.75         | 0.83                        | 0.83         | 0.83  |
| p12         | 1                              | 0.5                 | 0.83         | 0.92                        | 0.33         | 1     |
| p13         | 0.75                           | 0.92                | 0.92         | 0.92                        | 0.75         | 1     |
| p14         | 0.58                           | 0.92                | 0.92         | 1                           | 0.58         | 0.75  |
| p15         | 1                              | 0.67                | 0.67         | 1                           | 0.5          | 0.75  |
| p16         | 0.75                           | 0.58                | 0.75         | 0.92                        | 0.33         | 0.75  |
| p17         | 0.58                           | 0.42                | 0.83         | 0.75                        | 0.33         | 0.67  |
| p18         | 0.58                           | 1                   | 0.92         | 0.67                        | 0.92         | 1     |
| p19         | 0.75                           | 0.75                | 1            | 1                           | 0.25         | 0.75  |
| p20         | 0.92                           | 0.67                | 0.67         |                             |              |       |
| p21         | 0.58                           | 0.58                | 0.83         | 0.92                        | 0.42         | 0.83  |
| p22         | 0.92                           | 0.58                | 1            | 0.83                        | 1            | 1     |
| p23         | 0.75                           | 0.5                 | 1            | 0.92                        | 0.42         | 0.83  |

|     |                      |      |      |
|-----|----------------------|------|------|
| p24 | 0.92                 | 0.33 | 0.83 |
| p25 | 0.92                 | 0.42 | 0.83 |
| p26 | 0.92                 | 0.83 | 0.83 |
| p27 | 0.75                 | 0.92 | 0.83 |
| p28 | 0.83                 | 0.83 | 1    |
| p29 | 0.5                  | 0.75 | 0.67 |
| p30 | 0.75                 | 0.5  | 0.5  |
| p31 | 0.92                 | 0.67 | 0.83 |
| p32 |                      |      |      |
| p33 | 0.92                 | 0.42 | 0.83 |
| p34 | 0.83                 | 0.67 | 0.58 |
| p35 | 0.92                 | 0.5  | 0.92 |
| p36 | 0.92                 | 0.92 | 1    |
| p37 | 0.92                 | 0.83 | 0.92 |
| p38 | 0.75                 | 0.92 | 0.92 |
| p39 | 0.75                 | 0.92 | 0.75 |
| p40 | outlier on this task |      |      |
| p41 | 0.83                 | 0.67 | 0.92 |
| p42 | 0.92                 | 0.33 | 0.75 |
| p43 | 0.92                 | 0.75 | 0.92 |
| p44 | 0.92                 | 0.58 | 0.92 |
| p45 | 0.92                 | 0.83 | 0.92 |
| p46 | 0.67                 | 0.75 | 0.83 |
| p47 | 0.67                 | 0.92 | 0.67 |
| p48 | 0.75                 | 0.83 | 1    |
| p49 | 0.92                 | 0.58 | 0.67 |
| p50 | 1                    | 0.67 | 0.83 |
| p51 | 0.75                 | 0.83 | 1    |

|                      |      |      |
|----------------------|------|------|
| 0.83                 | 0.33 | 1    |
| 0.92                 | 0.75 | 0.83 |
| 0.58                 | 0.58 | 0.5  |
| 1                    | 0.58 | 0.83 |
| 1                    | 0.17 | 0.92 |
| 0.67                 | 0.58 | 0.67 |
| 0.67                 | 0.42 | 0.75 |
| 1                    | 0.58 | 0.92 |
| 0.92                 | 0.67 | 0.67 |
| 0.92                 | 0.42 | 0.58 |
| 0.58                 | 0.58 | 0.83 |
| 0.92                 | 0.5  | 0.92 |
| 1                    | 0.83 | 1    |
| 1                    | 0.42 | 1    |
| 0.83                 | 0.75 | 1    |
| 0.58                 | 0.58 | 0.75 |
| 0.75                 | 0.33 | 0.5  |
| 0.75                 | 0.75 | 0.83 |
| outlier on this task |      |      |
| 0.92                 | 0.42 | 0.83 |
| 0.83                 | 0.67 | 0.75 |
| 1                    | 0.5  | 0.92 |
| 1                    | 0.83 | 0.83 |
| 0.83                 | 0.92 | 0.92 |
| 1                    | 0.67 | 1    |
| 0.67                 | 0.75 | 0.92 |
| 1                    | 0.67 | 0.83 |
| 0.83                 | 0.58 | 0.92 |

|     |                      |      |      |
|-----|----------------------|------|------|
| p52 | 0.92                 | 0.75 | 0.67 |
| p53 | 0.92                 | 0.58 | 0.92 |
| p54 | outlier on this task |      |      |

|      |      |      |
|------|------|------|
| 0.92 | 0.58 | 0.83 |
| 1    | 0.5  | 1    |
| 0.75 | 0.42 | 0.75 |

Experiment 2\_singer performance.

| Participant | Celebrity stimuli - accuracy of pairing |                  | Unfamiliar Stimuli - accuracy of pairing |                  |
|-------------|-----------------------------------------|------------------|------------------------------------------|------------------|
|             | speaking-speaking                       | singing-speaking | speaking-speaking                        | singing-speaking |
| p1          | 1                                       | 0.42             | 1                                        | 0                |
| p2          | 0.75                                    | 0.17             | 0.92                                     | 0                |
| p3          | 1                                       | 1                | 1                                        | 0.5              |
| p4          | 1                                       | 0.5              | 1                                        | 0.17             |
| p5          | 1                                       | 0.42             | 0.92                                     | 0                |
| p6          | outlier                                 |                  |                                          |                  |
| p7          | 1                                       | 0.5              | 1                                        | 0.33             |
| p8          | 0.58                                    | 0.08             | 0.92                                     | 0.17             |
| p9          | 0.42                                    | 0                | 0.58                                     | 0.25             |
| p10         | 1                                       | 0.17             | 1                                        | 0.08             |
| p11         | 0.92                                    | 0.08             | 0.83                                     | 0.17             |
| p12         | 0.92                                    | 0.67             | 1                                        | 0.17             |
| p13         | 1                                       | 0.25             | 1                                        | 0.17             |
| p14         | 0.67                                    | 0.17             | 1                                        | 0.25             |
| p15         | 0.67                                    | 0.42             | 0.92                                     | 0.08             |
| p16         | 1                                       | 0.75             | 1                                        | 0.25             |
| p17         | 1                                       | 1                | 1                                        | 0.08             |

|     |      |      |
|-----|------|------|
| p18 | 0.83 | 0.42 |
| p19 | 1    | 0.5  |
| p20 | 1    | 0.58 |
| p21 | 1    | 0.5  |
| p22 | 0.5  | 0.75 |
| p23 | 1    | 1    |
| p24 | 0.67 | 0.17 |
| p25 | 0.5  | 0.33 |
| p26 | 1    | 1    |
| p27 | 1    | 0.5  |
| p28 | 0.83 | 0.5  |
| p29 | 1    | 0.33 |

p30 did not complete all trials

|     |      |      |
|-----|------|------|
| p31 | 0.58 | 0.42 |
| p32 | 1    | 0.17 |
| p33 | 0.25 | 0.17 |
| p34 | 1    | 0.58 |
| p35 | 0.58 | 0.58 |
| p36 | 1    | 0.83 |
| p37 | 0.83 | 0.33 |
| p38 | 0.92 | 0.75 |
| p39 | 0.67 | 0.17 |
| p40 | 0.67 | 0.25 |
| p41 | 0.33 | 0.17 |

|      |      |
|------|------|
| 1    | 0    |
| 0.92 | 0.17 |
| 1    | 0.58 |
| 1    | 0.25 |
| 0.92 | 0.25 |
| 0.83 | 0.42 |
| 0.83 | 0.42 |
| 1    | 0.08 |
| 0.83 | 0.08 |
| 1    | 0.42 |
| 1    | 0.08 |
| 1    | 0    |

|      |      |
|------|------|
| 0.67 | 0    |
| 0.83 | 0.08 |
| 0.83 | 0.33 |
| 0.83 | 0.17 |
| 0.67 | 0.08 |
| 1    | 0.17 |
| 0.75 | 0.17 |
| 0.83 | 0.17 |
| 1    | 0.08 |
| 1    | 0    |
| 0.83 | 0.17 |

Familiar singing-speaking sorting task

|   |    |    |    |    |    |    |    |    |    |    |    |
|---|----|----|----|----|----|----|----|----|----|----|----|
| A | DL | EH | EG | JG | JJ | ES | GE | HS | JA | OM | SS |
|---|----|----|----|----|----|----|----|----|----|----|----|

|      |      |      |      |      |      |      |      |      |      |      |      |      |
|------|------|------|------|------|------|------|------|------|------|------|------|------|
| A    | 0.59 | 0.18 | 0.05 | 0.03 | 0.13 |      |      |      |      |      |      |      |
| DL   | 0.05 | 0.31 | 0.08 | 0.08 | 0.13 | 0.23 |      |      |      |      |      |      |
| EH   | 0.05 | 0.08 | 0.38 | 0.18 | 0.05 | 0.13 | 0.03 |      |      |      |      |      |
| EG   | 0.08 | 0.13 | 0.18 | 0.33 | 0.10 | 0.08 |      |      |      |      |      |      |
| JG   | 0.15 | 0.18 | 0.08 | 0.08 | 0.28 | 0.08 |      |      |      |      |      |      |
| JJ   | 0.08 | 0.03 | 0.15 | 0.18 | 0.18 | 0.33 |      |      |      |      |      |      |
| ES   |      |      |      |      |      |      | 0.38 | 0.03 | 0.18 | 0.08 | 0.18 | 0.13 |
| GE   |      |      |      |      |      |      |      | 0.56 | 0.03 | 0.05 |      | 0.15 |
| HS   |      |      |      |      |      |      | 0.13 | 0.13 | 0.59 | 0.10 |      |      |
| JA   |      |      |      |      |      |      | 0.03 | 0.23 | 0.03 | 0.49 | 0.03 | 0.05 |
| OM   |      |      |      |      |      |      | 0.10 | 0.03 | 0.05 | 0.05 | 0.54 | 0.05 |
| SS   |      |      |      |      |      |      | 0.15 |      |      | 0.03 | 0.10 | 0.59 |
| FOIL |      |      |      | 0.05 |      |      | 0.03 |      |      |      |      |      |
| FOIL |      | 0.03 | 0.03 |      |      |      | 0.13 | 0.03 | 0.10 | 0.21 | 0.15 | 0.03 |
| FOIL |      | 0.08 | 0.05 | 0.08 | 0.10 | 0.13 |      |      |      |      |      |      |

Familiar speaking speaking sorting task

|    | A    | DL   | EH   | EG   | JG   | JJ   | ES   | GE   | HS   | JA   | OM   | SS   |
|----|------|------|------|------|------|------|------|------|------|------|------|------|
| A  | 0.77 | 0.05 |      |      | 0.08 | 0.08 |      |      |      |      |      |      |
| DL |      | 0.82 | 0.03 | 0.08 | 0.03 | 0.05 |      |      |      |      |      |      |
| EH |      | 0.03 | 0.90 | 0.03 |      | 0.05 |      |      |      |      |      |      |
| EG |      | 0.03 | 0.03 | 0.72 |      | 0.13 |      |      |      | 0.03 |      |      |
| JG | 0.05 | 0.03 |      | 0.03 | 0.85 |      |      |      |      |      |      |      |
| JJ | 0.15 | 0.03 | 0.05 | 0.08 |      | 0.69 |      |      |      |      |      |      |
| ES |      |      |      |      |      |      | 0.74 |      | 0.03 | 0.05 |      | 0.08 |
| GE |      |      |      |      |      |      |      | 0.92 |      | 0.03 |      |      |
| HS |      |      |      |      |      |      |      | 0.03 | 0.92 |      | 0.03 | 0.03 |
| JA |      |      |      |      |      |      | 0.03 | 0.03 |      | 0.87 |      |      |



|      |      |      |      |      |      |      |      |      |      |      |      |      |
|------|------|------|------|------|------|------|------|------|------|------|------|------|
| uf6  | 0.03 |      | 0.82 | 0.05 |      | 0.03 |      |      |      |      |      |      |
| uf7  |      | 0.03 | 0.03 | 0.92 |      |      |      |      |      |      |      |      |
| uf8  |      |      |      |      | 0.97 | 0.03 |      |      |      |      |      |      |
| uf11 |      |      | 0.03 |      | 0.03 | 0.95 |      |      |      |      |      |      |
| um1  |      |      |      |      |      |      | 0.90 |      | 0.03 |      |      |      |
| um2  |      |      |      |      |      |      |      | 1.00 |      |      |      |      |
| um3  |      |      |      |      |      |      | 0.05 |      | 0.82 | 0.10 |      |      |
| um4  |      |      |      |      |      |      | 0.03 |      | 0.03 | 0.82 | 0.03 |      |
| um5  |      |      |      |      |      |      |      |      | 0.03 | 0.03 | 0.97 | 0.03 |
| um6  |      |      |      |      |      |      |      |      |      |      |      | 0.97 |
| FOIL | 0.05 |      | 0.03 | 0.03 |      |      |      |      |      |      |      |      |
| FOIL |      |      | 0.05 |      |      |      |      |      |      |      |      |      |
| FOIL |      |      |      |      |      |      | 0.03 |      | 0.10 | 0.03 |      |      |
